# Supplementary material
Source: PubMed Central journal article supplement (PMC4724288)

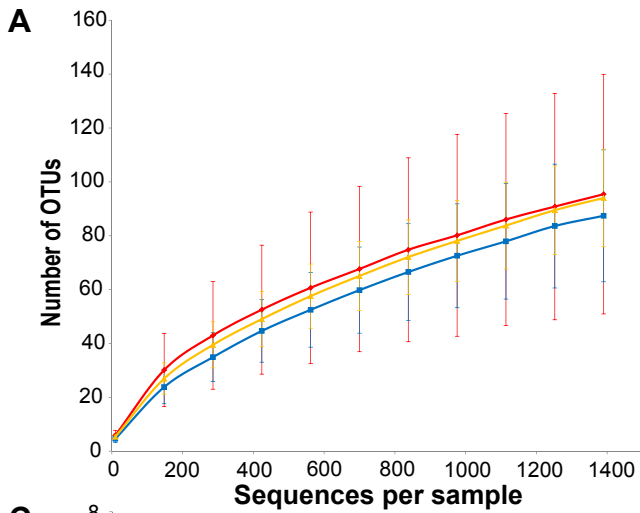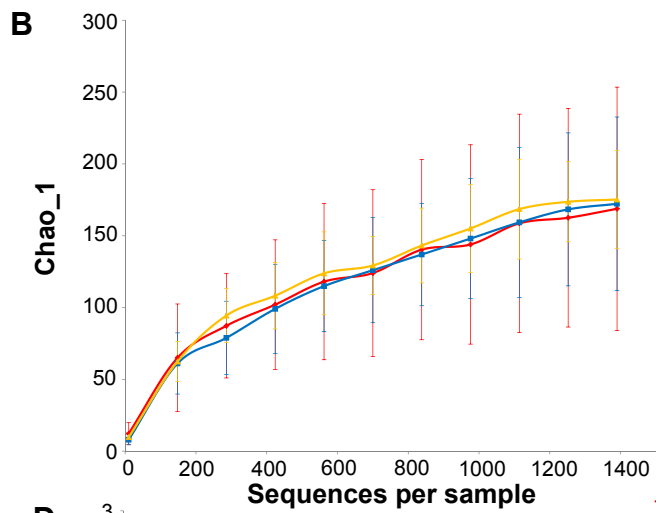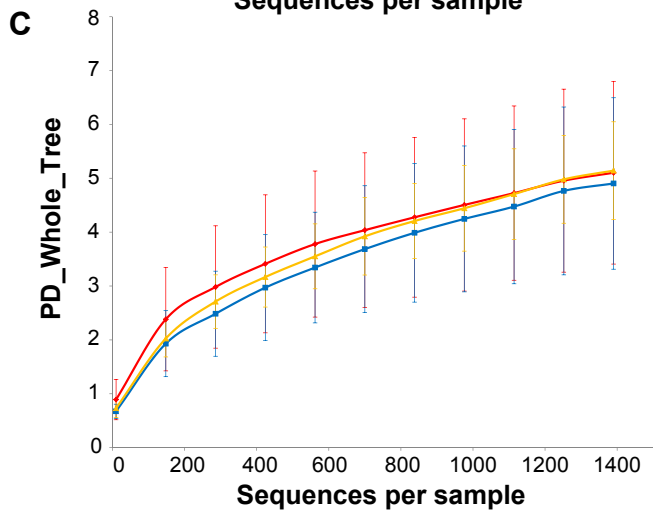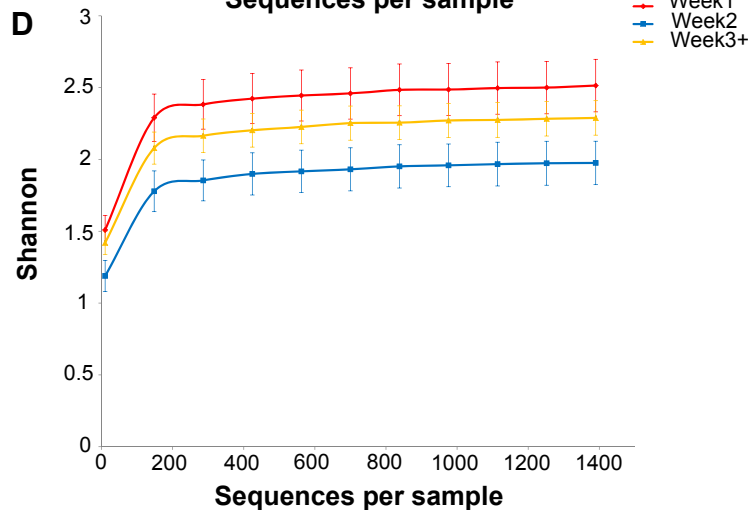

Supplement: NIHMS708046-supplement-Supplemental_Data_File__doc__pdf__etc___4.pdf [file NIHMS708046-supplement-Supplemental_Data_File__doc__pdf__etc___4.pdf]

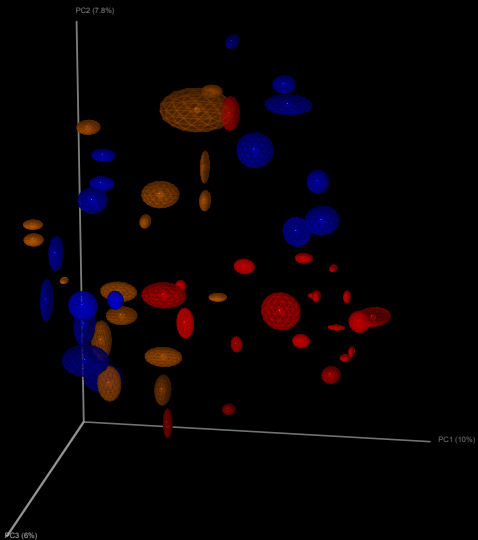

Supplement: NIHMS708046-supplement-Supplemental_Data_File__doc__pdf__etc___5.pdf [file NIHMS708046-supplement-Supplemental_Data_File__doc__pdf__etc___5.pdf]

Week 1

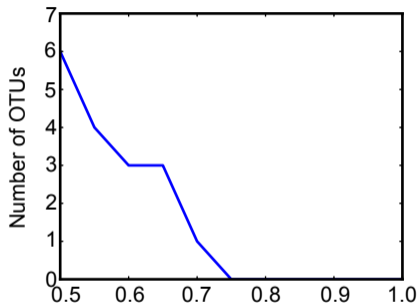

Week 2

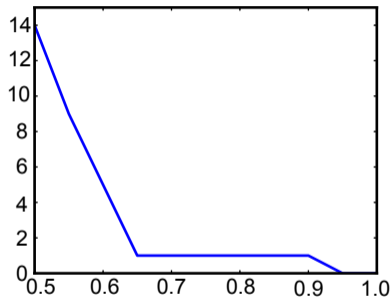

Week 3+

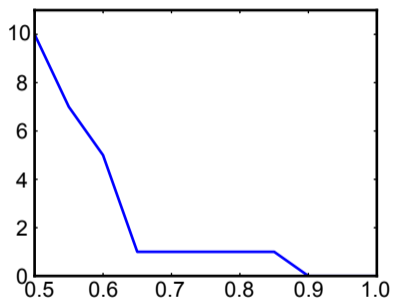

Fraction of samples that OTU must be observed in to be considered 'core'

Supplement: NIHMS708046-supplement-Supplemental_Data_File__doc__pdf__etc___6.pdf [file NIHMS708046-supplement-Supplemental_Data_File__doc__pdf__etc___6.pdf]

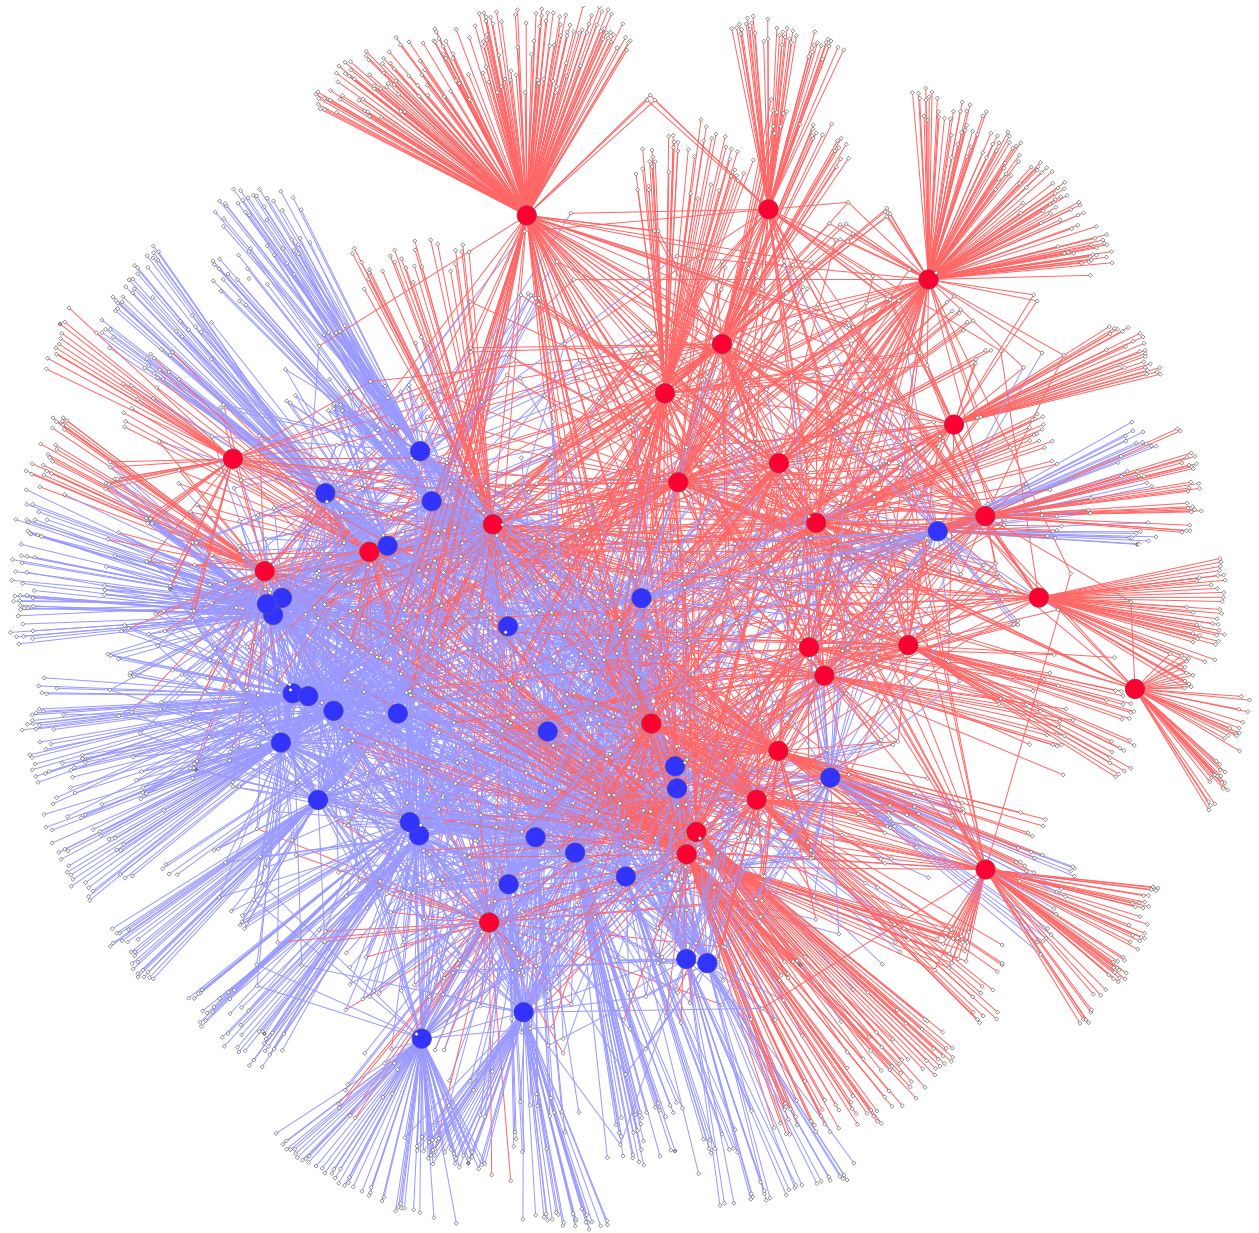

Supplement: NIHMS708046-supplement-Supplemental_Data_File__doc__pdf__etc___8.pdf [file NIHMS708046-supplement-Supplemental_Data_File__doc__pdf__etc___8.pdf]

Figure S6

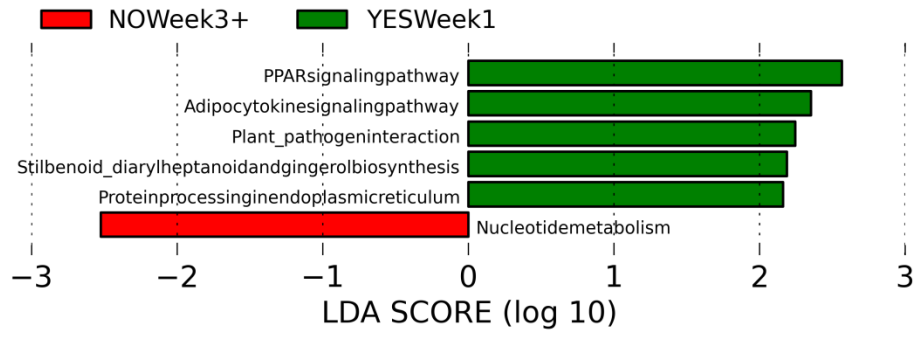

Supplement: NIHMS708046-supplement-Supplemental_Data_File__doc__pdf__etc___9.pdf [file NIHMS708046-supplement-Supplemental_Data_File__doc__pdf__etc___9.pdf]
